# Supplementary material for: Chemical Constituents, In Vitro Antioxidant Activity and In Silico Study on NADPH Oxidase of Allium sativum L. (Garlic) Essential Oil
Source: MDPI journal article supplement (doi:10.3390/antiox10111844), 2021-11-20
Supplement: s1 [file s1]

## Supplementary material

# Antioxidant activity, *In Silico* Study on NADPH Oxidase, and ADMET Prediction of the Chemical Constituents of *Allium sativum* L. (Garlic) Essential Oil

Oscar Herrera-Calderón <sup>1,\*</sup>, Luz Chacaltana-Ramos <sup>2</sup>, Irma Carmen Huayanca-Gutiérrez <sup>2</sup>, Majed A. Algarni <sup>3</sup>, Mohammed Alqarni <sup>4</sup> and Gaber El-Saber Batiha <sup>5</sup>

<sup>1</sup> Department of Pharmacology, Bromatology and Toxicology, Faculty of Pharmacy and Biochemistry, Universidad Nacional Mayor de San Marcos, Jr Puno 1002, Lima 15001, Peru.

<sup>2</sup> Department of Pharmaceutical Chemical; Faculty of Pharmacy and Biochemistry, Universidad Nacional San Luis Gonzaga, Av. Los Maestros s/n, Ica 11001, Peru; luz.chacaltana@unica.edu.pe

<sup>3</sup> Department of Clinical Pharmacy, College of Pharmacy, Taif University, P.O. Box 11099, Taif 21944, Saudi Arabia; m.alqarni@tu.edu.sa

<sup>4</sup> Department of Pharmaceutical Chemistry, College of Pharmacy, Taif University, P.O. Box 11099, Taif 21944, Saudi Arabia; m.aalqarni@tu.edu.sa

<sup>5</sup> Department of Pharmacology and Therapeutics, Faculty of Veterinary Medicine, Damanhour University, Damanhour 22515, Al Beheira; Egypt; dr\_gaber\_batiha@vetmed.dmu.edu.eg

\* Correspondence: oherreraca@unmsm.edu.pe; Tel.: (+51-956-550-510)

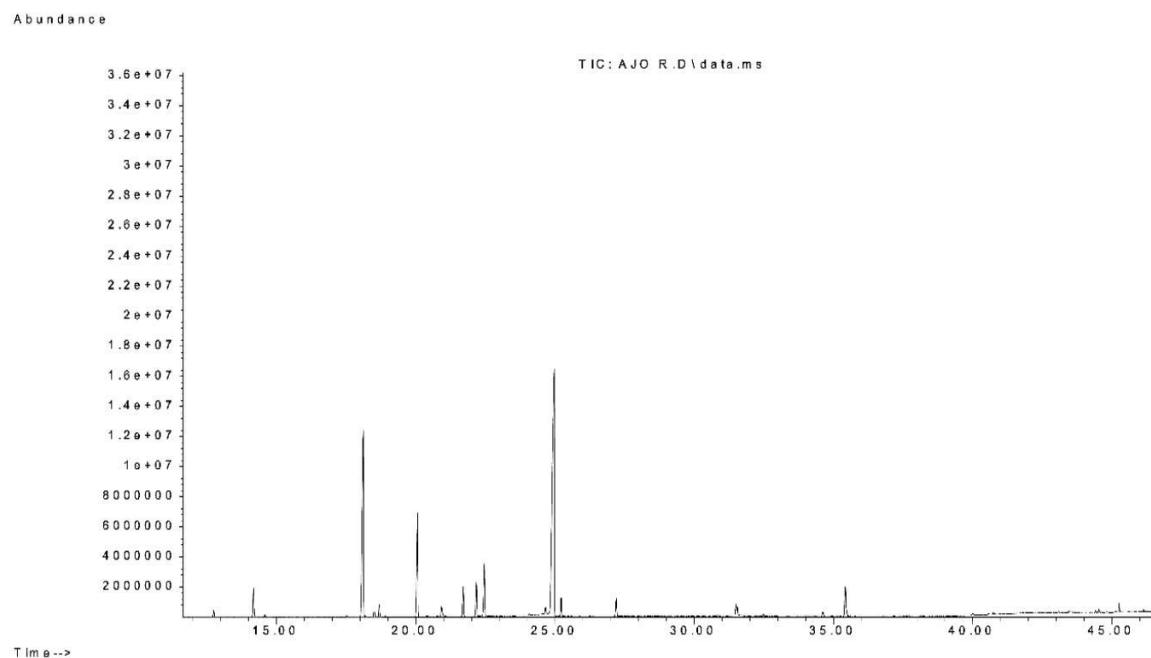

Figure S1. GC chromatogram of the essential oil from garlic

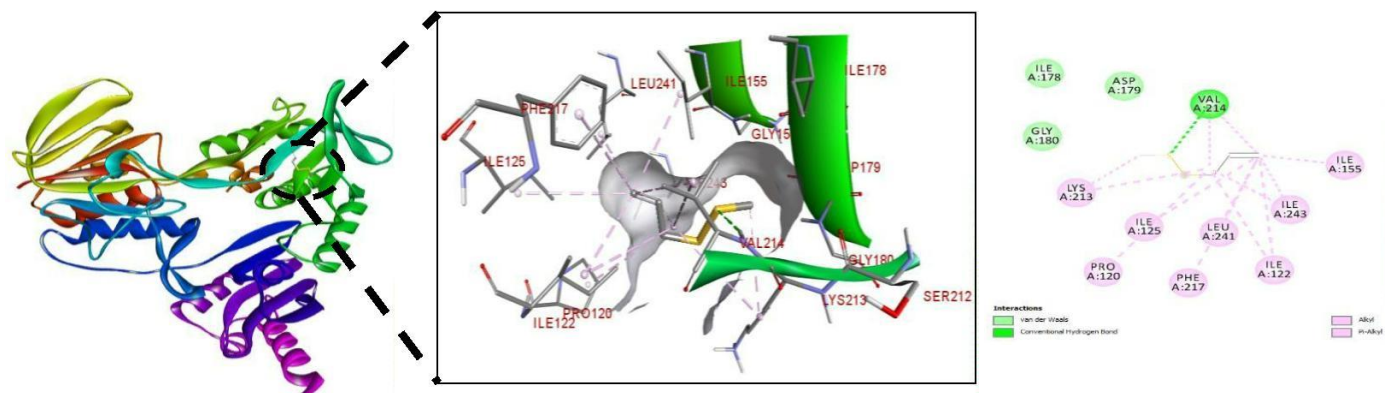

Figure S2. Molecular interaction studies of Allyl methyl disulfide with NADPH-oxidase (PDB ID: 2CDU), surface view (Left panel), and 2D (Right panel) interactions.

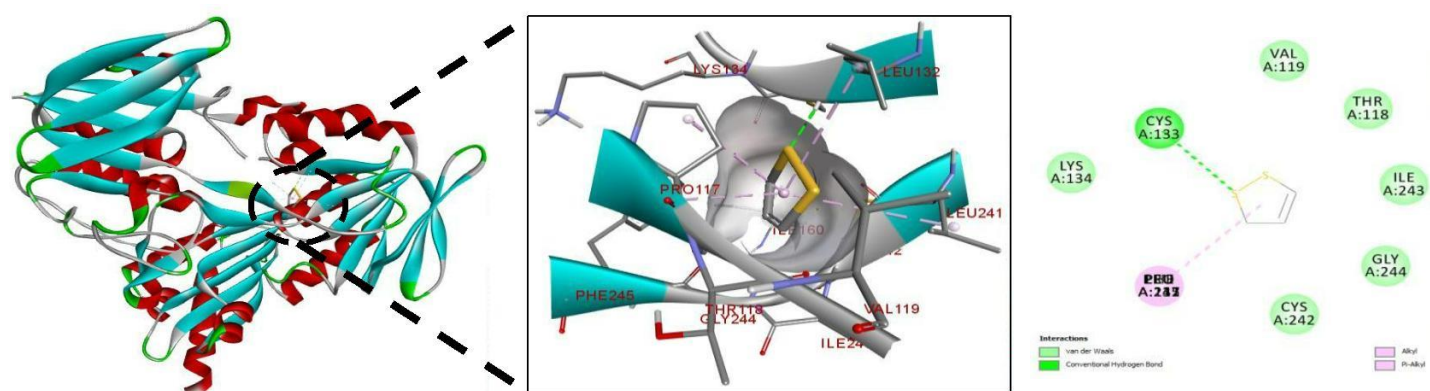

Figure S3. Molecular interaction studies of 3H-1,2-dithiole with NADPH-oxidase (PDB ID: 2CDU), surface view (Left panel), and 2D (Right panel) interactions.

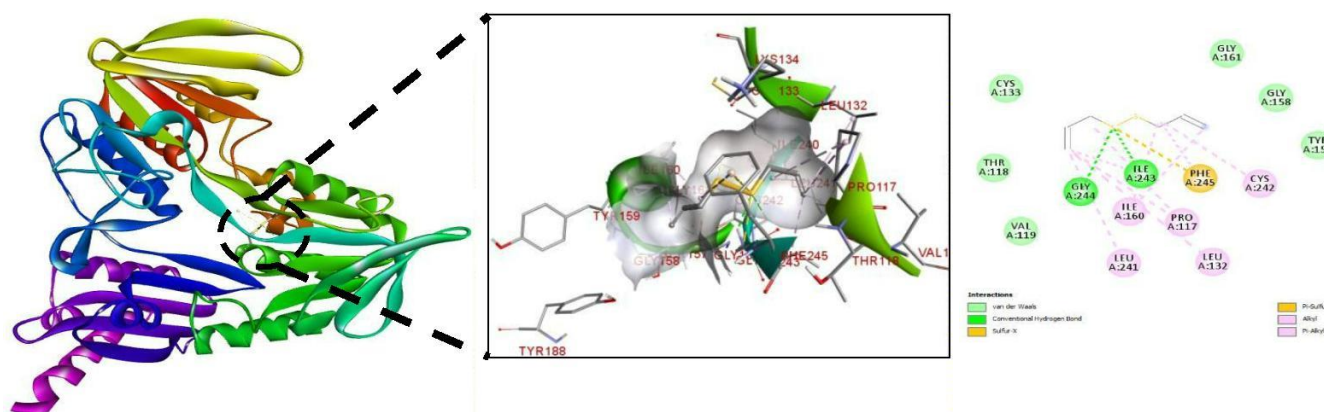

Figure S4. Molecular interaction studies of Diallyl disulfide with NADPH-oxidase (PDB ID: 2CDU), surface view (Left panel), and 2D (Right panel) interactions.

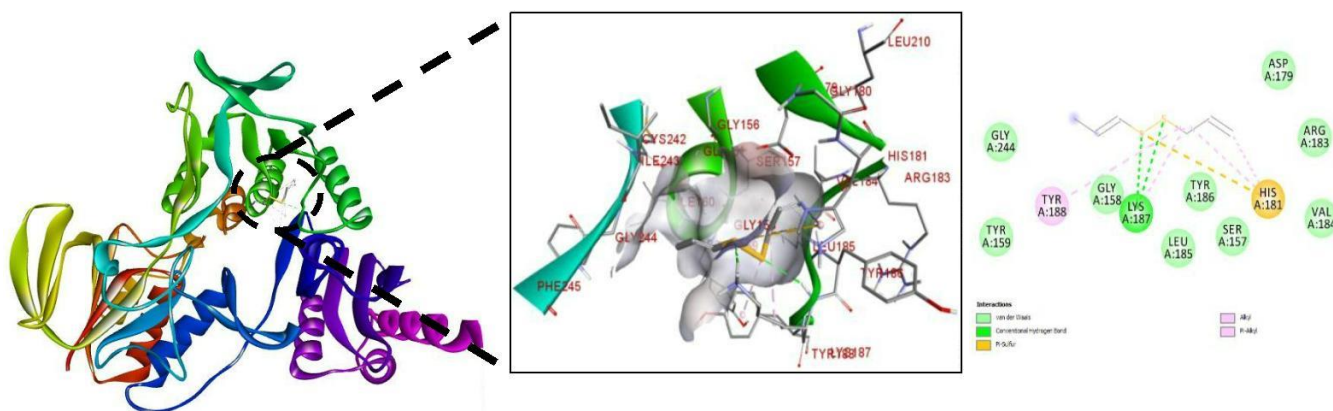

Figure S5. Molecular interaction studies of 1-propenyl 2-propenyl- (E) -disulfide with NADPH-oxidase (PDB ID: 2CDU), surface view (Left panel), and 2D (Right panel) interactions.

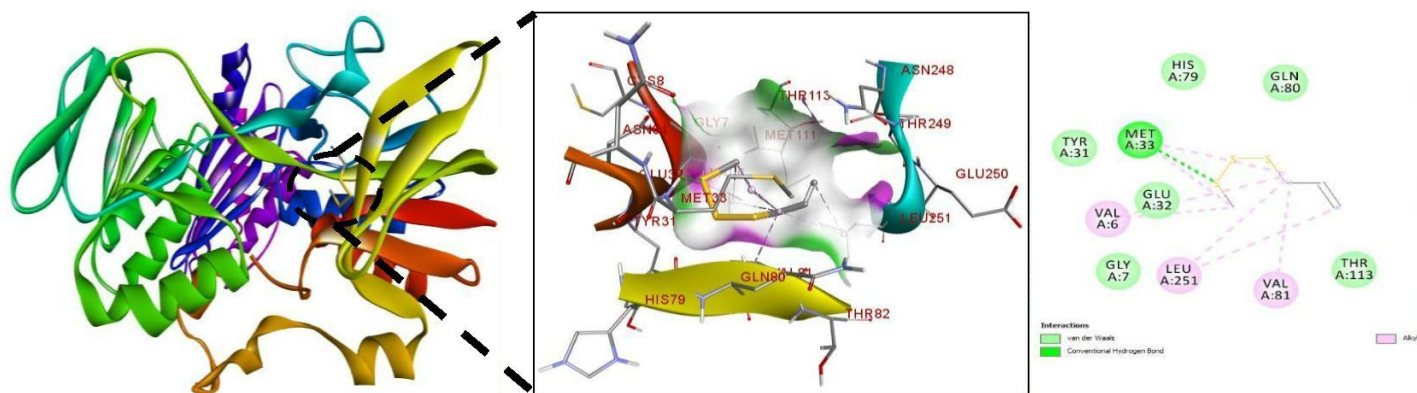

Figure S6. Molecular interaction studies of Allyl methyl trisulfide with NADPH-oxidase (PDB ID: 2CDU), surface view (Left panel), and 2D (Right panel) interactions.

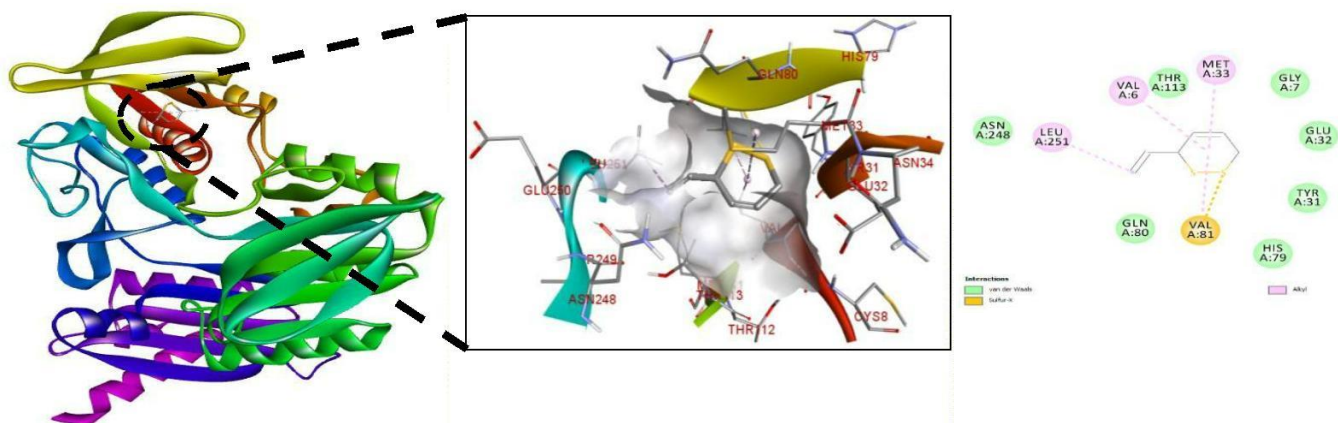

Figure S7. Molecular interaction studies of 3-Vinyl-1,2-dithiacyclohex-4-ene with NADPH-oxidase (PDB ID: 2CDU), surface view (Left panel), and 2D (Right panel) interactions.



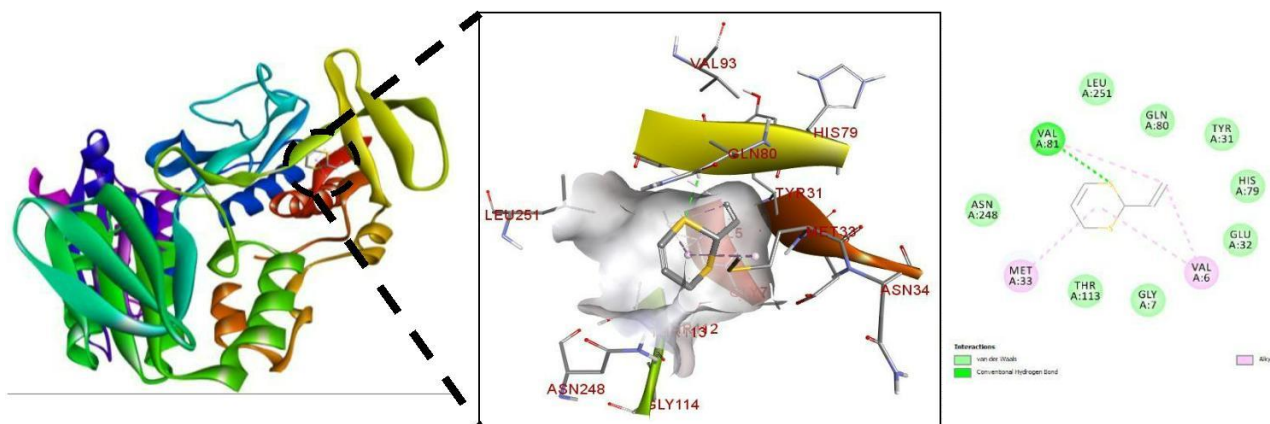

Figure S8. Molecular interaction studies of 2-Vinyl-4H-1,3-dithiine with NADPH-oxidase (PDB ID: 2CDU), surface view (Left panel), and 2D (Right panel) interactions.

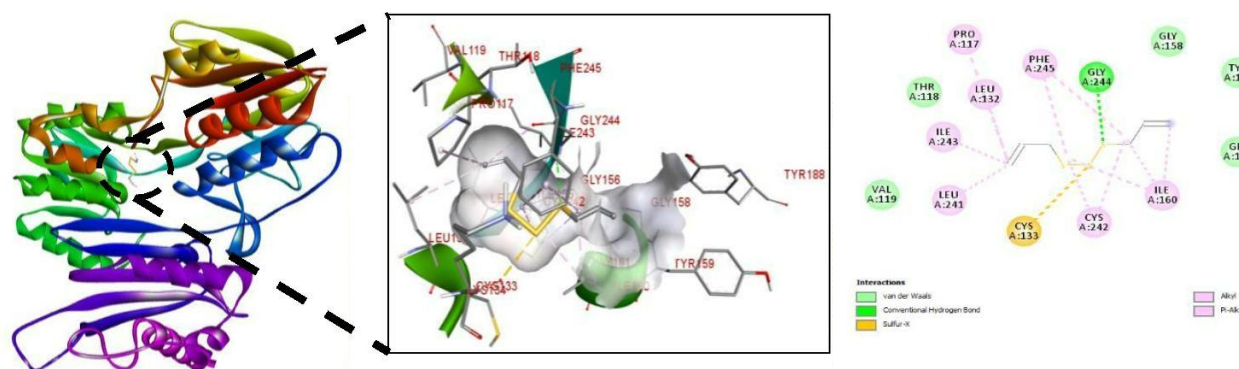

Figure S9. Molecular interaction studies of Diallyl trisulfide with NADPH-oxidase (PDB ID: 2CDU), surface view (Left panel), and 2D (Right panel) interactions.

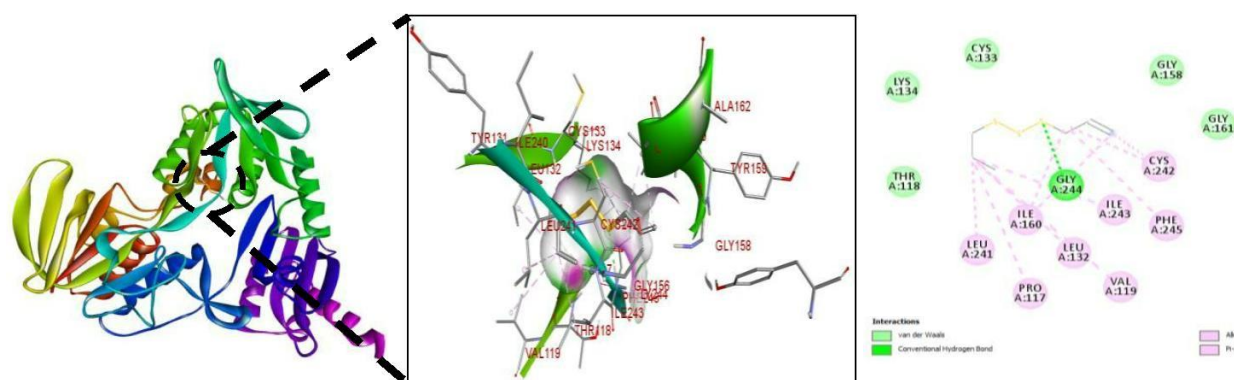

Figure S10. Molecular interaction studies of 1-Allyl-3-propyltrisulfan with NADPH-oxidase (PDB ID: 2CDU), surface view (Left panel), and 2D (Right panel) interactions.
